# Supplementary material
Source: publisher figshare collection journal article supplement (https://karger.figshare.com/articles/dataset/_/20381448)
Supplement: Supplementary file 1 [file 1]

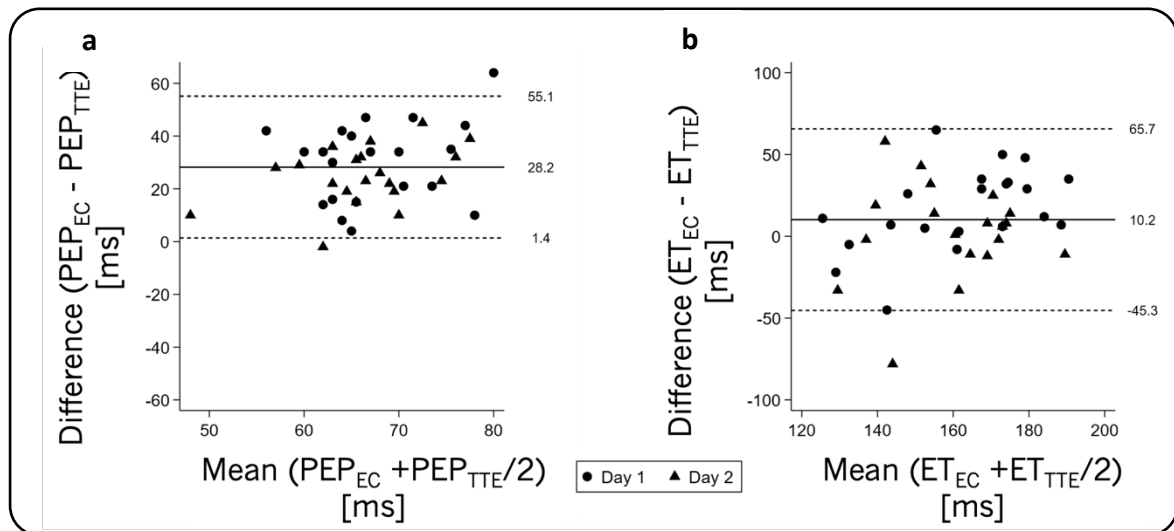

### Supplement S6 Bland and Altman plots for left ventricular systolic time intervals

Bland-Altman plots for LV (left ventricular) **a**: PEP (pre-ejection period) and **b**: ET (ejection time) for paired measurements on day 1 and 2. EC: Electrical Cardiometry, TTE: transthoracic echocardiography.
