# Supplementary material
Source: publisher figshare collection journal article supplement (https://karger.figshare.com/articles/dataset/_/20381448)
Supplement: Supplementary file 2 [file 1]

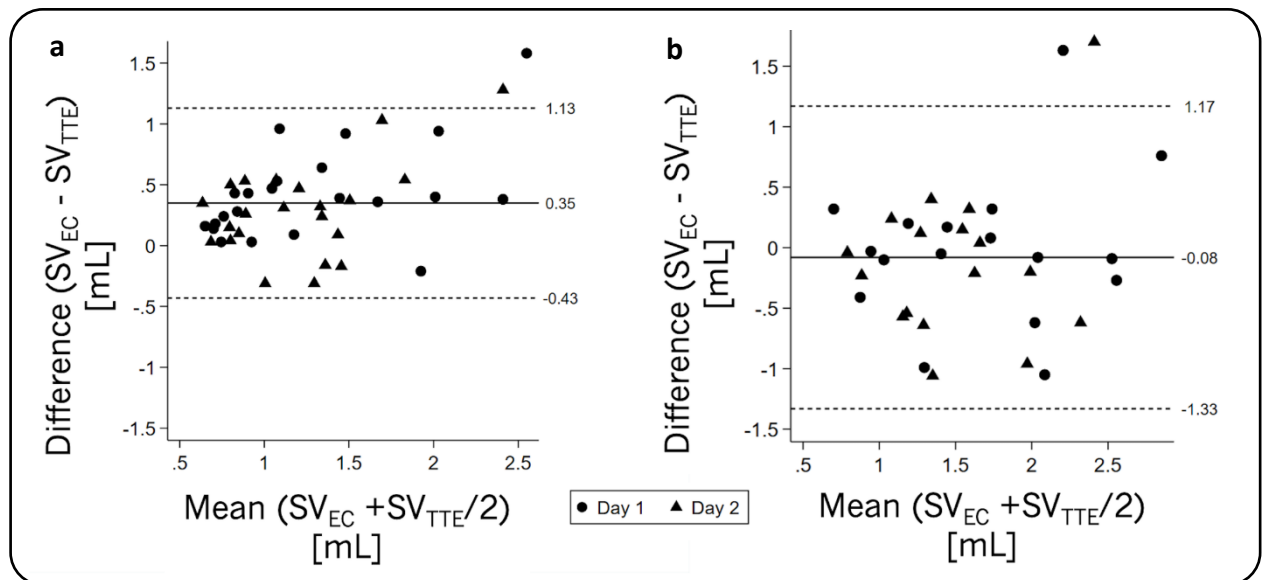

**Supplement S5** Bland and Altman plots for left (LV-SV) and right ventricular stroke volume (RV-SV)

Bland-Altman plots for **a**: LV (left ventricular) SV (stroke volume) and **b**: RV (right ventricular)SV for paired measurements on day 1 and 2.

EC: Electrical Cardiometry, TTE: transthoracic echocardiography.
