# Supplementary material
Source: publisher figshare collection journal article supplement (https://karger.figshare.com/articles/dataset/_/20381448)

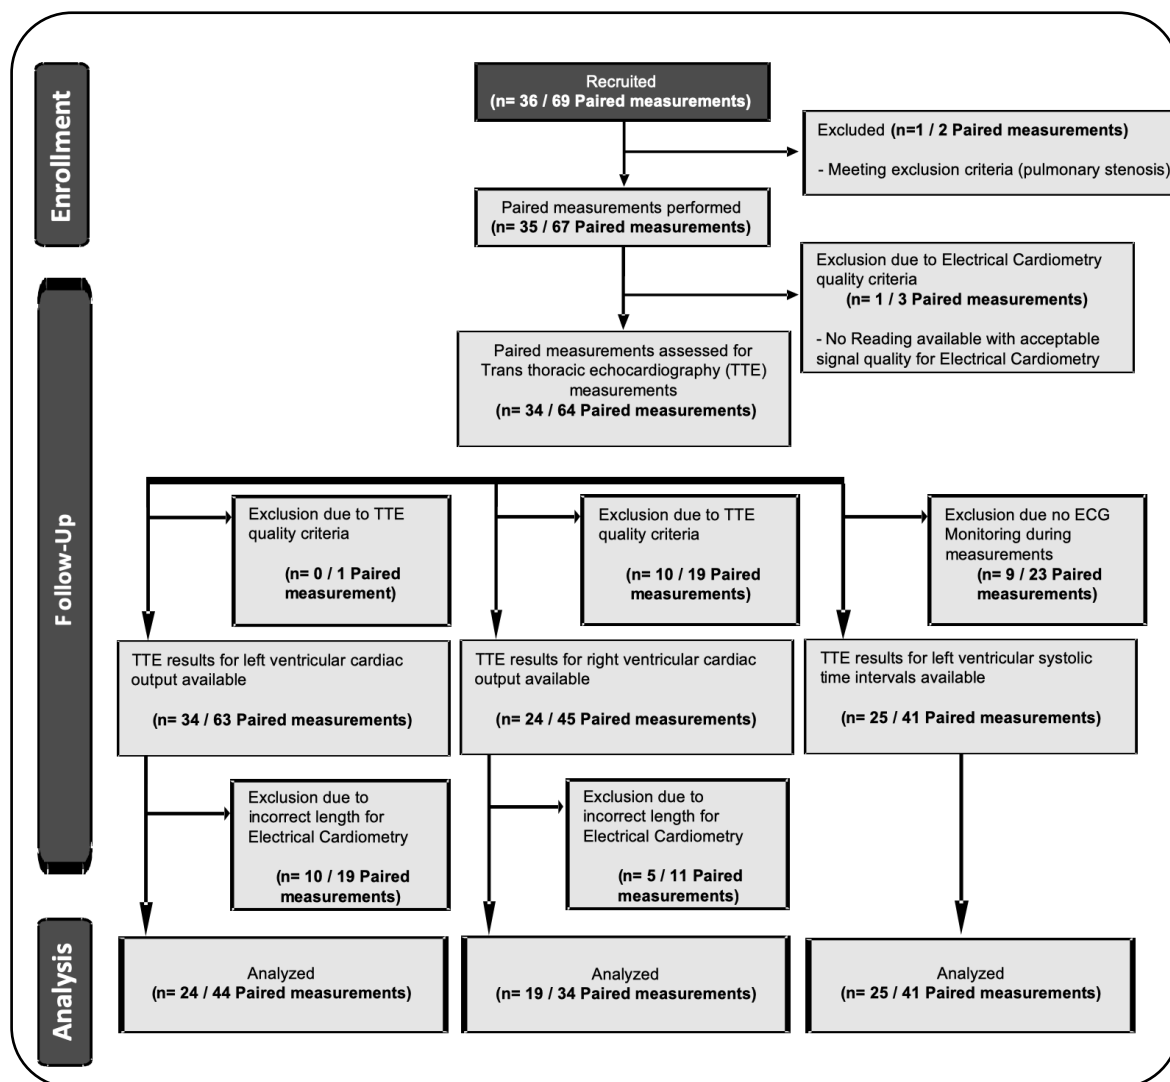

**Supplement S2** Modified STROBE Flow chart

Supplement: Supplementary file 3 [file 1]
